# Supplementary material
Source: PubMed Central journal article supplement (PMC4575629)

**Figure 3**

**A**

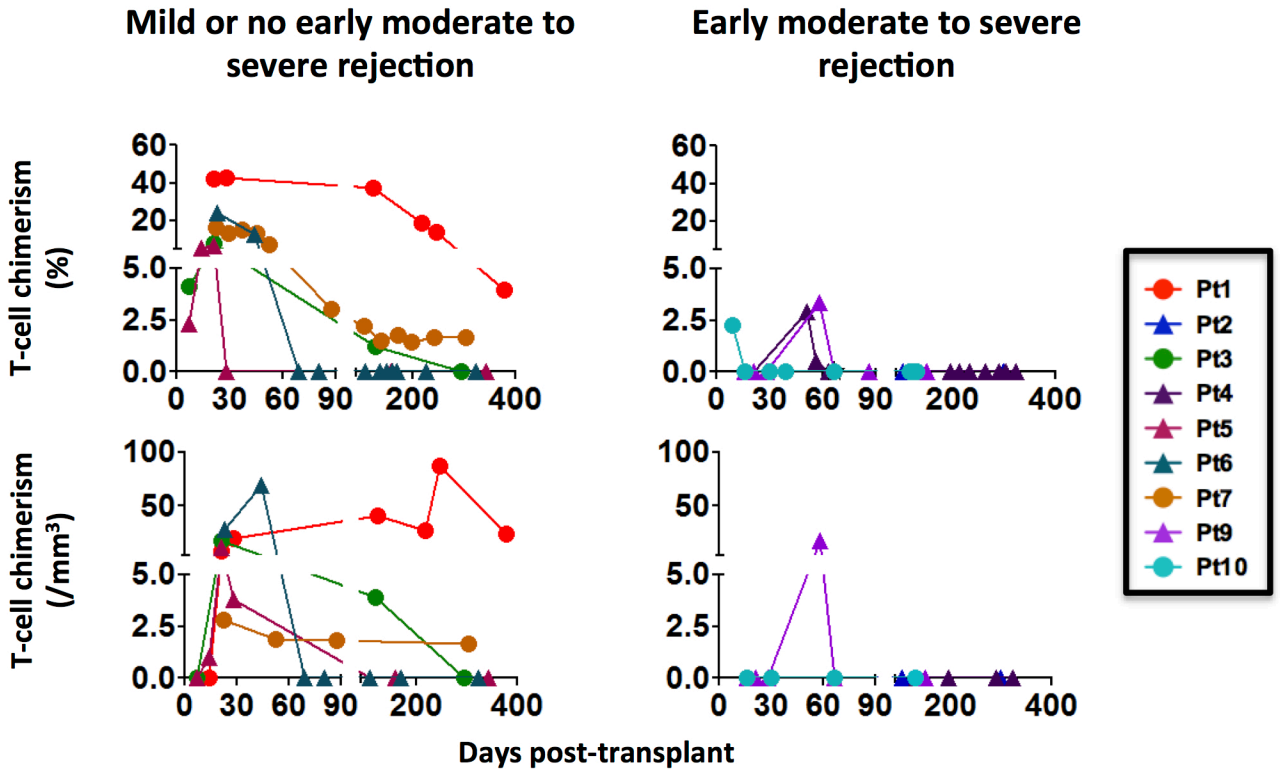

**B**

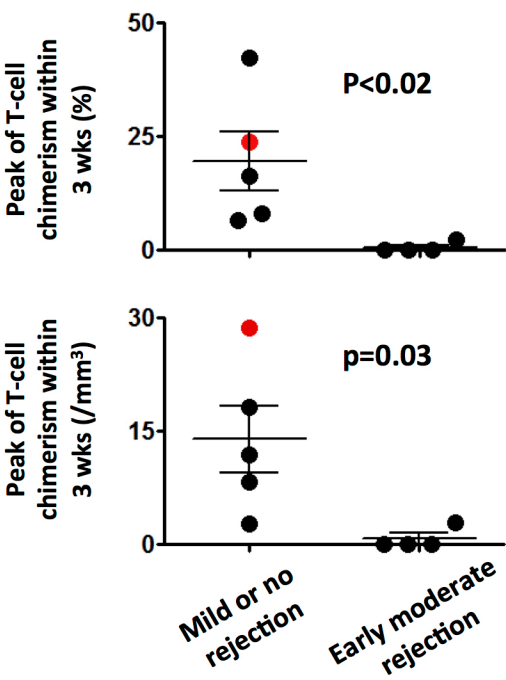

**C**

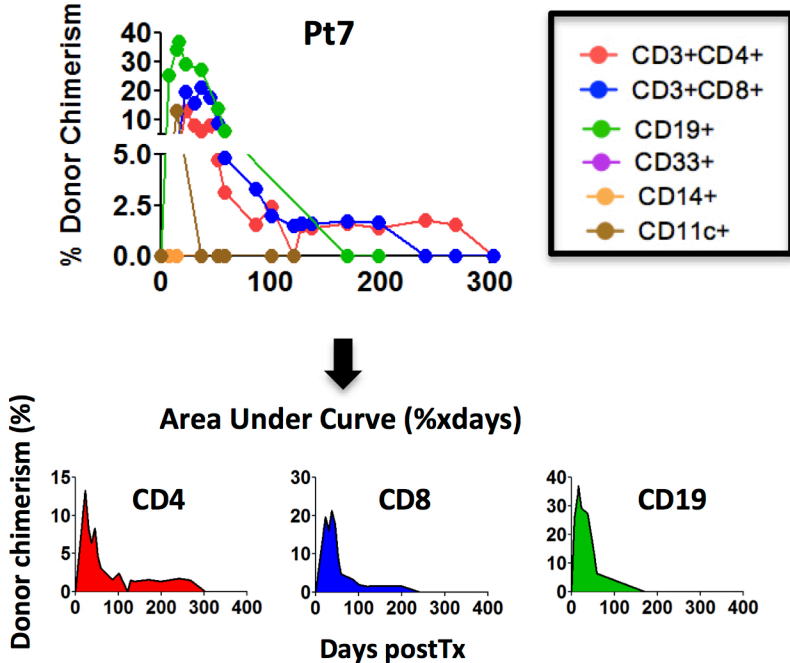

Supplement: NIHMS702666-supplement-Figure_3.pdf [file NIHMS702666-supplement-Figure_3.pdf]
